# Supplementary material
Source: PubMed Central journal article supplement (PMC3651502)
Supplement: 1304592110_pnas.201304592SI.pdf [file 1304592110_pnas.201304592SI.pdf]

# Supporting Information

Shibata et al. 10.1073/pnas.1304592110

## SI Materials and Methods

MS analysis was performed at the W. M. Keck Foundation Biotechnology Resource Laboratory, Yale University, using a Thermo Scientific LTQ Orbitrap mass spectrometer equipped with a Waters nanoAcquity UPLC system. Liquid chromatography separation was performed with a Waters Symmetry C18 180- $\mu\text{m}$   $\times$  20-mm trap column and a 1.7  $\mu\text{m}$ , 75- $\mu\text{m}$   $\times$  250-mm nanoAcquity UPLC column (35  $^{\circ}\text{C}$ ) for peptide separation. Trapping was done at 15  $\mu\text{L}/\text{min}$ , 99% (vol/vol) Buffer A (100% water, 0.1% formic acid) for 1 min. Peptide separation was performed at 300 nL/min with Buffer A: 100% water, 0.1% formic acid, and Buffer B: 100%  $\text{CH}_3\text{CN}$ , 0.075% formic acid. A linear gradient (91 min) was run with 5% (vol/vol) Buffer B

at initial conditions, 40% (vol/vol) Buffer B at 90 min, and 85% (vol/vol) Buffer B at 91 min. MS was acquired in the Orbitrap using 1 microscan, and a maximum inject time of 900 ms followed by six data-dependent MS/MS acquisitions in the ion trap. All MS/MS spectra were searched in-house using the Mascot ([www.matrixscience.com](http://www.matrixscience.com)) Distiller program to generate Mascot-compatible files before using the Mascot algorithm to search the National Center for Biotechnology Information, nr (non-redundant) database. Parameters used for searching were variable methionine oxidation and carbamidomethylated cysteine, a peptide tolerance of  $\pm 20$  ppm, MS/MS fragment tolerance of  $\pm 0.6$  Da, and peptide charges of +2 or +3. Normal and decoy database searches were run.

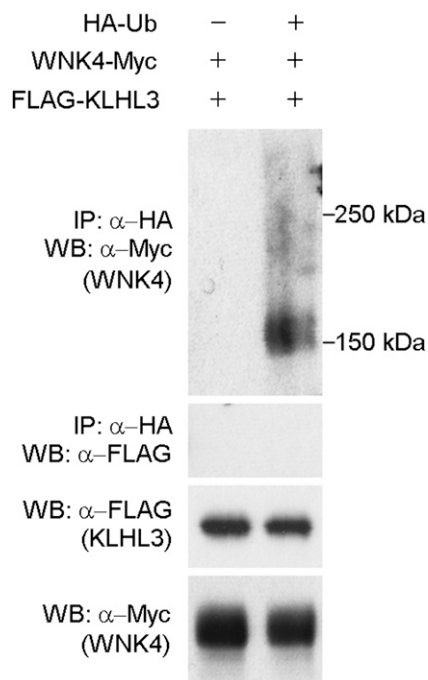

**Fig. S1.** Polyubiquitination of WNK4. Cell lysates expressing the indicated proteins were immunoprecipitated with an antibody to HA in denaturing condition, followed by Western blotting. Anti-Myc-reactive proteins in anti-HA immunoprecipitates correspond to polyubiquitinated WNK4. KLHL3, Kelch-like 3; IP, immunoprecipitation; Ub, ubiquitin; WB, Western blotting; WNK4, with no lysine kinase 4.

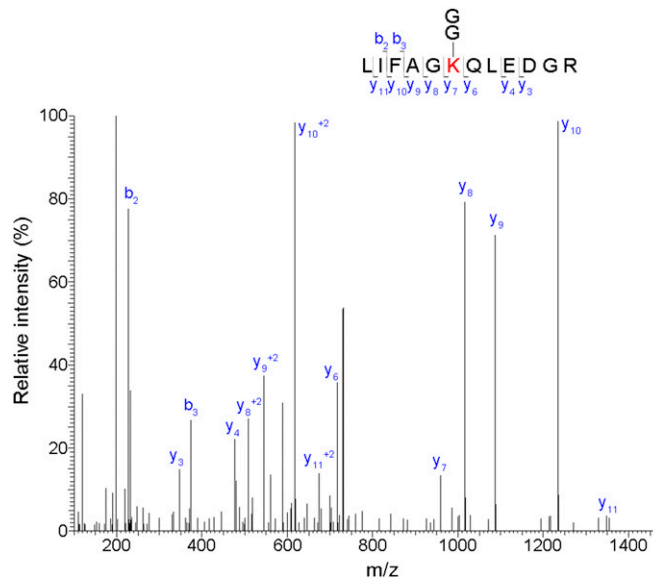

**Fig. S2.** A representative MS/MS spectrum showing assignment of the peptide containing ubiquitinated K48 in ubiquitin. Specific y and b fragment ions allowed the identification of lysine residue with di-glycine modification.

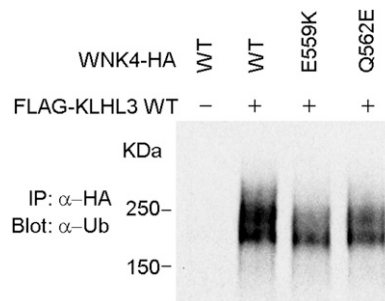

**Fig. S3.** Polyubiquitination of WNK4 through KLHL3 was reduced by E559K or Q562E substitution. COS-7 cell lysates expressing the indicated proteins were immunoprecipitated with an antibody to HA, followed by Western blotting with anti-ubiquitin antibody.

**Table S1. List of CUL3 peptides identified by LC-MS/MS**

| Score | Peptide sequence          | M/Z      | Charge |
|-------|---------------------------|----------|--------|
| 84    | MQHNVLVAEVTQQLK           | 869.47   | 2      |
| 66    | GLTEQEVETILDK             | 737.88   | 2      |
| 65    | EDGSEVGVGGAQVTGSNTR       | 910.42   | 2      |
| 60    | YVNSIWDLLK                | 625.84   | 2      |
| 60    | ALQSLAC*GKPTQR            | 715.38   | 2      |
| 57    | VLTGGYWPTQSATPK           | 825.43   | 2      |
| 47    | NAC*QMLMILGLEGR           | 803.40   | 2      |
| 41    | NAYTMVLHK                 | 538.78   | 2      |
| 40    | KNNSGLSFEELYR             | 778.89   | 2      |
| 38    | FLLESFNDR                 | 627.81   | 2      |
| 37    | SVYEEDFEAPFLEMSAEFFQMESQK | 1,006.77 | 3      |
| 35    | HAFEIFR                   | 460.24   | 2      |
| 31    | VYTYVA                    | 715.36   | 1      |
| 31    | LKTEC*GC*QFTSK            | 486.89   | 3      |
| 31    | NAIQEIQR                  | 971.52   | 1      |
| 30    | TEC*GC*QFTSK              | 609.25   | 2      |
| 19    | MQHNVLVAEVTQQLK           | 579.98   | 3      |
| 16    | TMC*EC*MSSYLK             | 719.28   | 2      |
| 16    | ALVSEEGEGKNPVDYIQGLLDLK   | 829.77   | 3      |
| 9     | FLPSPVVIK                 | 564.36   | 2      |

C\*, carbamidomethylated cysteine; CUL3, cullin 3; LC, liquid chromatography.

**Table S2. List of WNK1 peptides identified by LC-MS/MS**

| Score | Peptide sequence       | M/Z      | Charge |
|-------|------------------------|----------|--------|
| 77    | IGDLGLATLK             | 500.80   | 2      |
| 52    | GPVLATSSGAGVFK         | 645.85   | 2      |
| 38    | LGAAAADAGTGR           | 1,030.53 | 1      |
| 29    | VPPAVIIPPAAPLSGR       | 777.97   | 2      |
| 24    | GLQHPNIVR              | 517.30   | 2      |
| 15    | VTSGVKPASFDK           | 618.33   | 2      |
| 11    | EGPVASPPFMDLEQAVLPAVIK | 1,203.14 | 2      |

LC, liquid chromatography.
